# Supplementary material for: Blp1 protein shows virulence-associated features and elicits protective immunity to Acinetobacter baumannii infection
Source: PubMed Central journal article supplement (PMC6873735; doi:10.1186/s12866-019-1615-3), 2019-11-21
Supplement: 12866_2019_1615_MOESM1_ESM.pdf [file 12866_2019_1615_MOESM1_ESM.pdf]

1 **Supplemental Table S1.** Oligonucleotides, plasmids and strains used in this work.

| <b>Primers</b>    | <b>Sequence (5' to 3')</b>                                                                                                                                                       | <b>Purpose</b>                                          | <b>Source</b> |
|-------------------|----------------------------------------------------------------------------------------------------------------------------------------------------------------------------------|---------------------------------------------------------|---------------|
| BaF               | GCACCAAATGCAGCAACTCA                                                                                                                                                             | <i>blp1<sub>IC I</sub></i> gene allele detection        | This work     |
| BaR               | TGCTCGTTACAGAAAGCGGT                                                                                                                                                             |                                                         |               |
| BaF               | GCACCAAATGCAGCAACTCA                                                                                                                                                             | <i>blp1<sub>IC II</sub></i> gene allele detection       | This work     |
| Blp2R             | TACTCGTTACGGAAGGTTCT                                                                                                                                                             |                                                         |               |
| BaprB             | GATCAGTATGGTCAATTAT                                                                                                                                                              | Expression of <i>blp1</i> gene                          | This work     |
| BapRaiR           | CAGCGTGATCAACTACAACACTAC                                                                                                                                                         |                                                         |               |
| Fjgms             | AGGACAGAAATGCCTCGAC                                                                                                                                                              | <i>aac(3)-I</i> amplification                           | [1]           |
| Rjgms             | ATCTCGGCTTGAACGAATT                                                                                                                                                              |                                                         |               |
| Bav1              | CATTACAATGCTTAAGCTA                                                                                                                                                              | <i>blp1</i> upstream region                             | This work     |
| Bav2              | <u>CATATTAACAATAATTTGCTTCCTTCATCGGTAGAAAC</u>                                                                                                                                    | amplification; additional sequence underlined           |               |
| Bav3              | GCAAATTATTGTTTAATATG                                                                                                                                                             | <i>blp1</i> downstream region                           | This work     |
| Bav4              | <u>GTCGAGGCATTTCTGTCCTGGTTTAGCAATAGAACGGAT</u>                                                                                                                                   | amplification; additional sequence underlined           |               |
| Bpat              | AAGAGACTTTTAATAGGCGAT                                                                                                                                                            | <i>blp1</i> gene deletion confirmation with Bav4 primer | This work     |
| BlpKIF            | ACTGGAATTCCTATAAGACACTTAACTTATGAG                                                                                                                                                | <i>blp1</i> gene with upstream region                   | This work     |
| BlpKIR            | AGTCGGTACCAATTAACTCCATCAGACTTAGTC                                                                                                                                                | amplification                                           |               |
| Aac3I_seqR        | CGAAGTCGAGGCATTTCTGT                                                                                                                                                             | Confirmation of transformed bacteria                    | This work     |
| AcORI_seqR        | AGGCTGTTGATAACTTTTGGAA                                                                                                                                                           |                                                         |               |
| BldBamF           | TTCTAGGATCCGAATATTGCTCCAGTAATT                                                                                                                                                   | <i>blp1<sub>2652-3362</sub></i> cloning into            | This work     |
| BIXhR             | TTCT <u>ACTCGAGT</u> TAAACAATAATTTGCTGG                                                                                                                                          | expression vector; restrictions sites underlined        |               |
| <b>Plasmids</b>   | <b>Relevant characteristics</b>                                                                                                                                                  | <b>Source</b>                                           |               |
| pUC19_sacB        | pUC19 derivative with <i>sacB</i> gene from <i>Bacillus</i> sp.; for the generation of markerless gene deletion mutants                                                          | [1]                                                     |               |
| pUC19_gm_AcORI    | pUC19 derivative with <i>aac(3)-I</i> gentamicin aminoglycoside acetyltransferase cassette and ori site from <i>Acinetobacter</i> ; for the complementation experiments          | This work                                               |               |
| pUC_sacB_UDblp1Gm | pUC19_sacB derivative with upstream and downstream regions of <i>A. baumannii</i> <i>blp1</i> gene and <i>aac(3)-I</i> gentamicin aminoglycoside acetyltransferase cassette from | This work                                               |               |

|                                                                    |                                                                                                                                                                                                                                                                    |                          |
|--------------------------------------------------------------------|--------------------------------------------------------------------------------------------------------------------------------------------------------------------------------------------------------------------------------------------------------------------|--------------------------|
| <i>pblp1</i> <sub>IC I</sub>                                       | clinical <i>A. baumannii</i> strain; for the generation of markerless gene deletion mutants<br>pUC19_gm_AcORI derivative with <i>blp1</i> gene along with upstream region (plausible promoter) from Ab <sub>IC I</sub> strain; for the complementation experiments | This work                |
| <i>pblp1</i> <sub>IC II</sub>                                      | pUC19_gm_AcORI derivative with <i>blp1</i> gene along with upstream region (plausible promoter) from Ab <sub>IC II</sub> strain; for the complementation experiments                                                                                               | This work                |
| pET-28b                                                            | Protein expression vector                                                                                                                                                                                                                                          | Novagen                  |
| pET-His-Blp1 <sub>2652-3362</sub>                                  | Blp1 <sub>2652-3362</sub> expression plasmid, His-tag fused N-terminally to protein                                                                                                                                                                                | This work                |
| <b>Strains</b>                                                     | <b>Relevant characteristics</b>                                                                                                                                                                                                                                    | <b>Source</b>            |
| <i>Acinetobacter baumannii</i> Ab <sub>IC I</sub>                  | Representative IC I clone strain <sup>a</sup> ; MDR strain, gentamicin sensitive                                                                                                                                                                                   | [2]                      |
| <i>Acinetobacter baumannii</i> Ab <sub>IC II</sub>                 | Representative IC II clone strain <sup>a</sup> ; MDR strain, gentamicin sensitive                                                                                                                                                                                  | [2]                      |
| Ab <sub>IC I</sub> Δ <i>blp1</i>                                   | <i>blp1</i> gene-negative mutant of <i>A. baumannii</i> strain Ab <sub>IC I</sub> ; markerless                                                                                                                                                                     | This work                |
| Ab <sub>IC II</sub> Δ <i>blp1</i>                                  | <i>blp1</i> gene-negative mutant of <i>A. baumannii</i> strain Ab <sub>IC II</sub> ; markerless                                                                                                                                                                    | This work                |
| Ab <sub>IC I</sub> Δ <i>blp1</i> ::p                               | Ab <sub>IC I</sub> Δ <i>blp1</i> strain with pUC19_gm_AcORI plasmid                                                                                                                                                                                                | This work                |
| Ab <sub>IC II</sub> Δ <i>blp1</i> ::p                              | Ab <sub>IC II</sub> Δ <i>blp1</i> strain with pUC19_gm_AcORI plasmid                                                                                                                                                                                               | This work                |
| Ab <sub>IC I</sub> Δ <i>blp1</i> :: <i>pblp1</i> <sub>IC I</sub>   | Ab <sub>IC I</sub> Δ <i>blp1</i> strain complemented with <i>pblp1</i> <sub>IC I</sub>                                                                                                                                                                             | This work                |
| Ab <sub>IC I</sub> Δ <i>blp1</i> :: <i>pblp1</i> <sub>IC II</sub>  | Ab <sub>IC I</sub> Δ <i>blp1</i> strain complemented with <i>pblp1</i> <sub>IC II</sub>                                                                                                                                                                            | This work                |
| Ab <sub>IC II</sub> Δ <i>blp1</i> :: <i>pblp1</i> <sub>IC I</sub>  | Ab <sub>IC II</sub> Δ <i>blp1</i> strain complemented with <i>pblp1</i> <sub>IC I</sub>                                                                                                                                                                            | This work                |
| Ab <sub>IC II</sub> Δ <i>blp1</i> :: <i>pblp1</i> <sub>IC II</sub> | Ab <sub>IC II</sub> Δ <i>blp1</i> strain complemented with <i>pblp1</i> <sub>IC II</sub>                                                                                                                                                                           | This work                |
| <i>Escherichia coli</i> OP50                                       | Wild type, bacterial food source for <i>C. elegans</i>                                                                                                                                                                                                             | [3]                      |
| <i>E. coli</i> JM107                                               | endA1 glnV44 thi-1 relA1 gyrA96 Δ(lac-proAB) [F <sub>-</sub> traD36 proAB <sup>+</sup> lacIq lacZΔM15] hsdR17(RK- mK <sup>+</sup> ) λ-                                                                                                                             | [4]                      |
| <i>E. coli</i> ArcticExpress (DE3)                                 | B <sup>-</sup> F <sup>-</sup> ompT hsdS(r <sub>B</sub> <sup>-</sup> m <sub>B</sub> <sup>-</sup> ) dcm <sup>+</sup> Tet <sup>r</sup> gal λ(DE3) endA Hte [cpn10 cpn60 Gent <sup>r</sup> ]                                                                           | Thermo Fisher Scientific |

2 <sup>a</sup> Strains were assigned to IC I and IC II by trilocus sequence-based typing (3LST) as described previously [2]; Strains were isolated from Lithuanian University  
3 of Health Sciences Kauno Klinikos Hospital in 2010.

4

5 [1] Skerniškytė J, Krasauskas R, Péchoux C, Kulakauskas S, Armalytė J, Sužiedėlienė E. Surface-related features and virulence

6 among *Acinetobacter baumannii* clinical isolates belonging to international clones I and II. Front. Microbiol. 2019;9:3116.

- 7 [2] Povilonis J, Seputiene V, Krasauskas R, Juskaite R, Miskinyte M, Suziedelis K, et al. Spread of carbapenem-resistant  
8 *Acinetobacter baumannii* carrying a plasmid with two genes encoding OXA-72 carbapenemase in Lithuanian hospitals. J Antimicrob  
9 Chemother. 2013;68(5):1000-6.
- 10 [3] Brenner S. The genetics of *Caenorhabditis elegans*. Genetic. 1974; 77: 71–94;
- 11 [4] Yanisch-Perron C, Vieira J, Messing J. Improved M13 phage cloning vectors and host strains: nucleotide sequences of the  
12 M13mp18 and pUC19 vectors. Gene. 1985;33(1):103-19. Erratum in: Gene. 1992;114(1):81-3.
