# Supplementary material for: Blp1 protein shows virulence-associated features and elicits protective immunity to Acinetobacter baumannii infection
Source: PubMed Central journal article supplement (PMC6873735; doi:10.1186/s12866-019-1615-3), 2019-11-21
Supplement: 12866_2019_1615_MOESM2_ESM.pdf [file 12866_2019_1615_MOESM2_ESM.pdf]

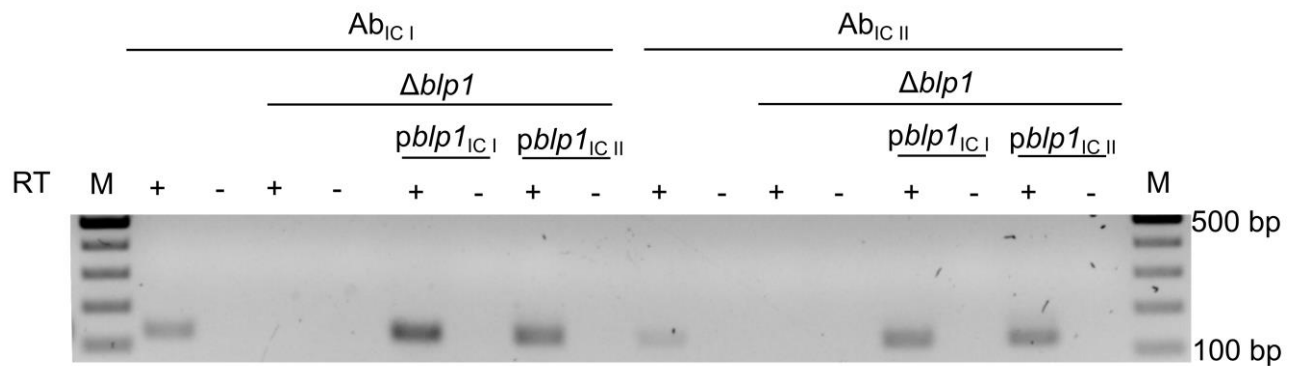

**Supplemental Fig. S1. *blp1* gene expression in *A. baumannii* IC I and IC II strains.** Amplicons of *blp1* fragment generated using cDNA obtained from *A. baumannii* strains Ab<sub>IC I</sub> and Ab<sub>IC II</sub>, were fractionated on 1% agarose gel; RT +/- indicates the addition of reverse transcriptase during the synthesis of cDNA; M – GeneRuler Mix (SM0331, ThermoFisher Scientific)
