# Supplementary material for: Blp1 protein shows virulence-associated features and elicits protective immunity to Acinetobacter baumannii infection
Source: PubMed Central journal article supplement (PMC6873735; doi:10.1186/s12866-019-1615-3), 2019-11-21
Supplement: 12866_2019_1615_MOESM3_ESM.pdf [file 12866_2019_1615_MOESM3_ESM.pdf]

**After 2 hours of incubation:**

**Ab<sub>IC1</sub>**

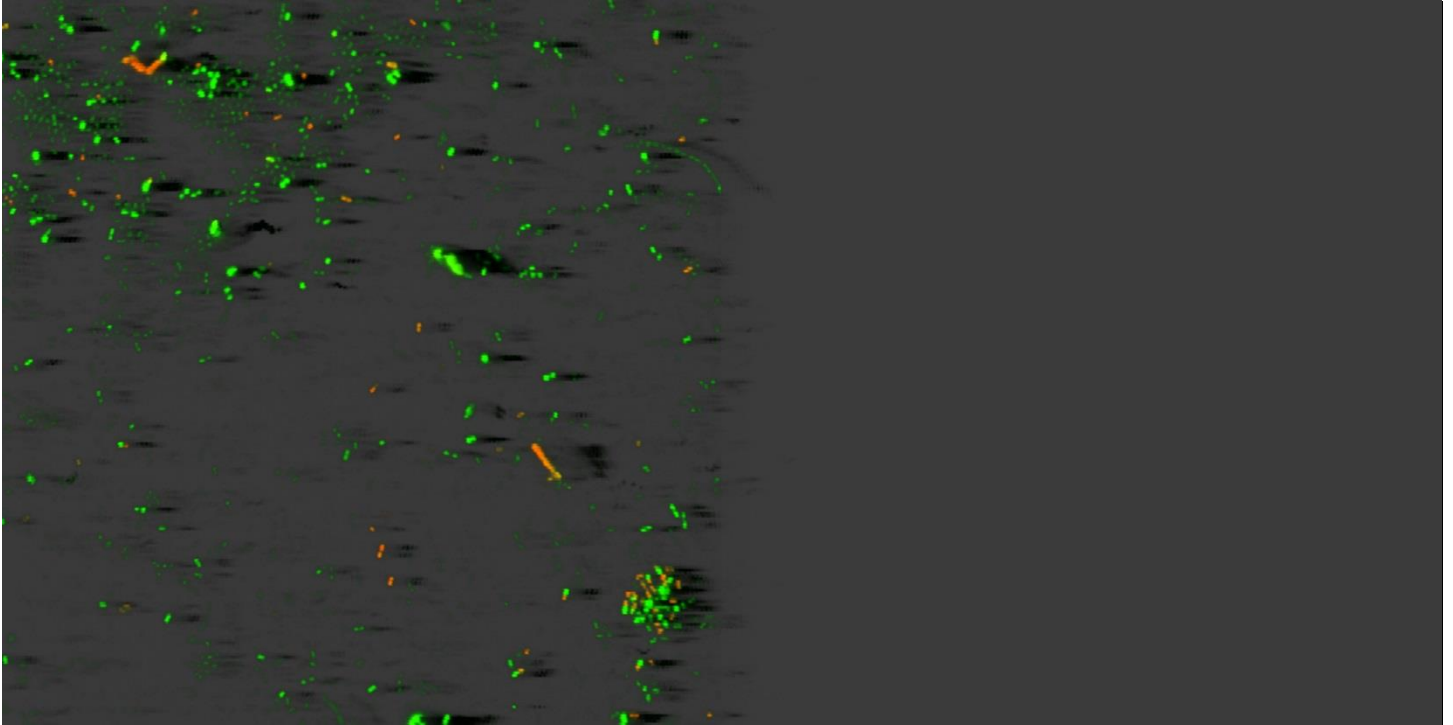

**Ab<sub>IC1</sub>Δ*blp1***

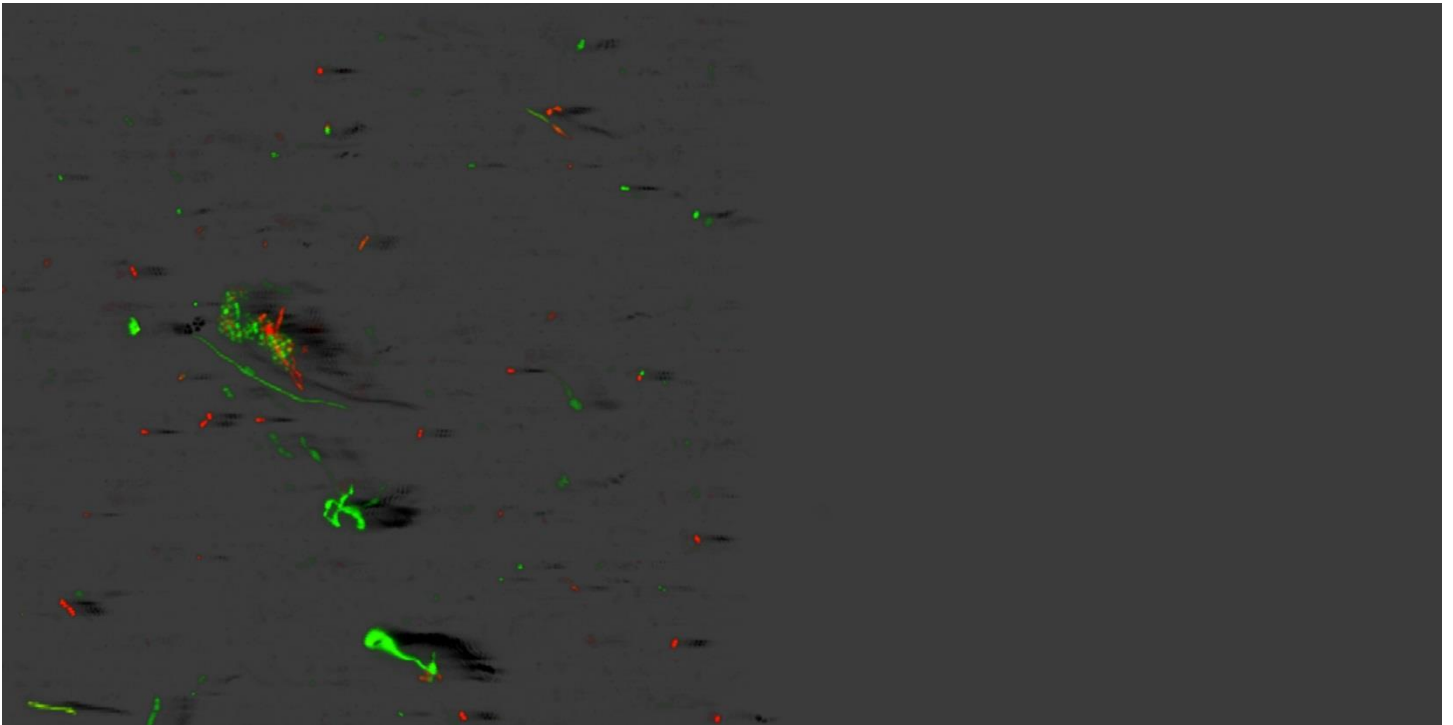

$Ab_{IC1}\Delta blp1::pblp1_{IC1}$

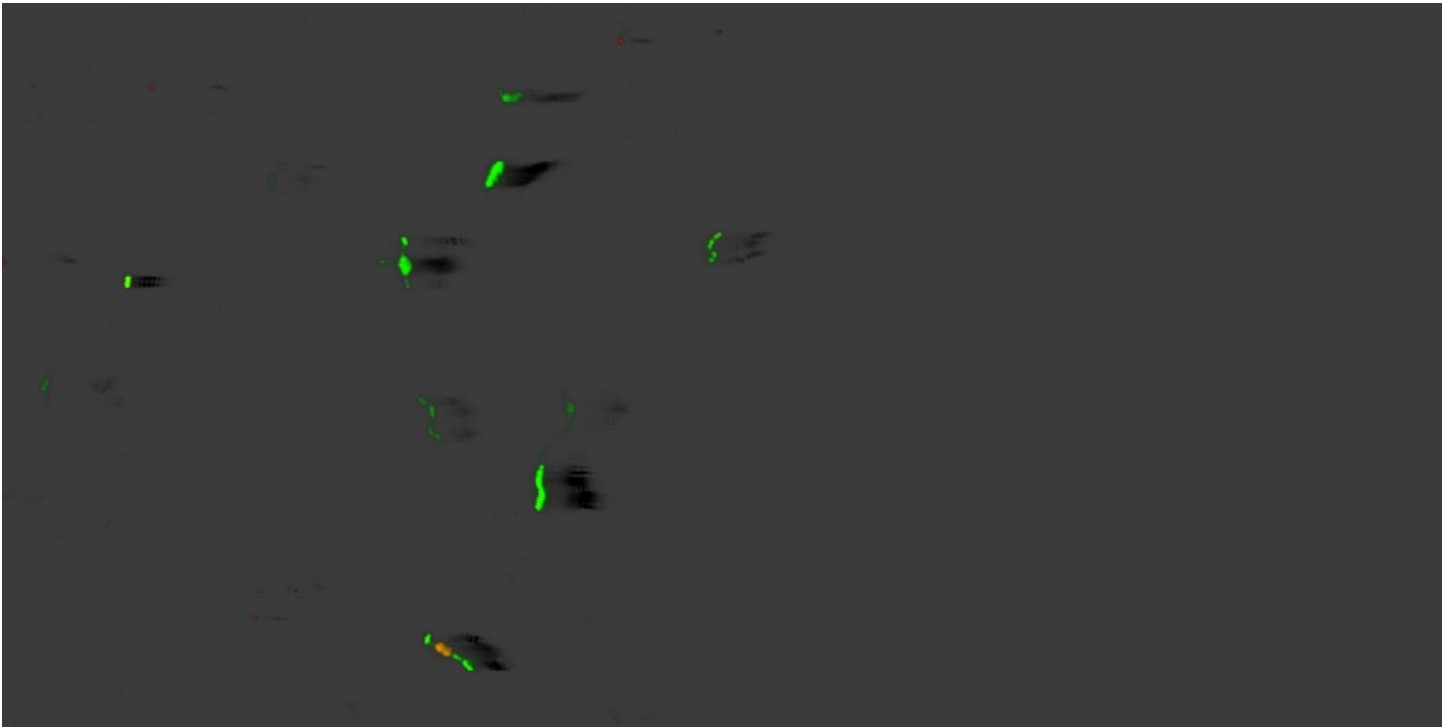

$Ab_{IC1}\Delta blp1::pblp1_{ICII}$

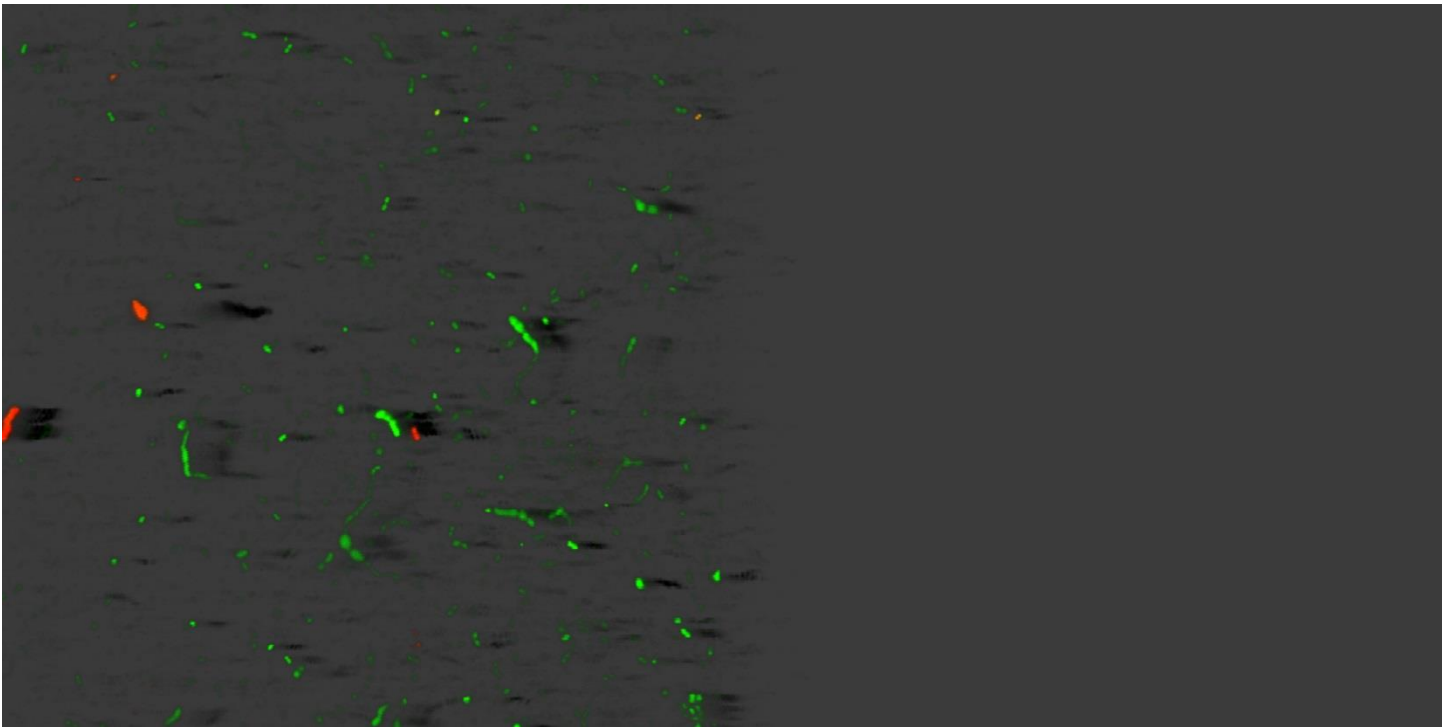

Ab<sub>IC</sub>Δ*blp1*::p

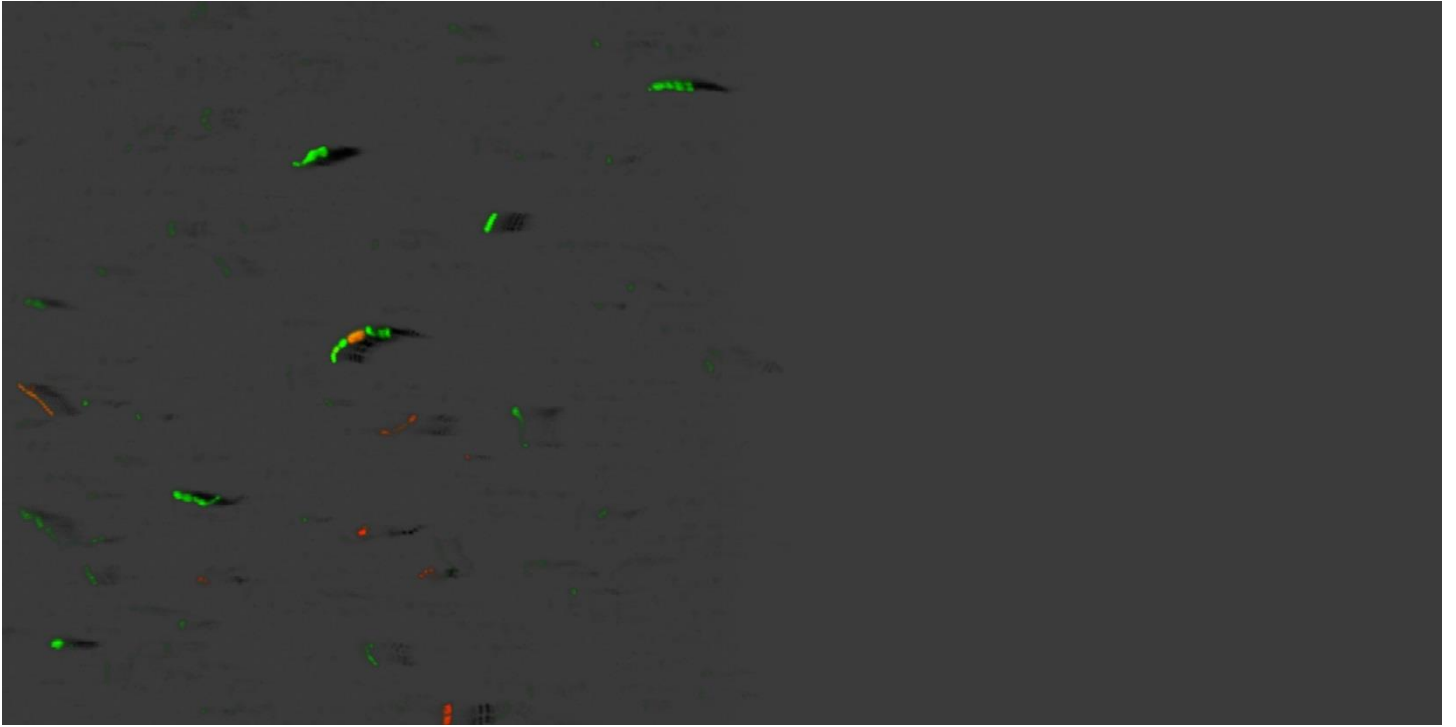

Ab<sub>IC II</sub>

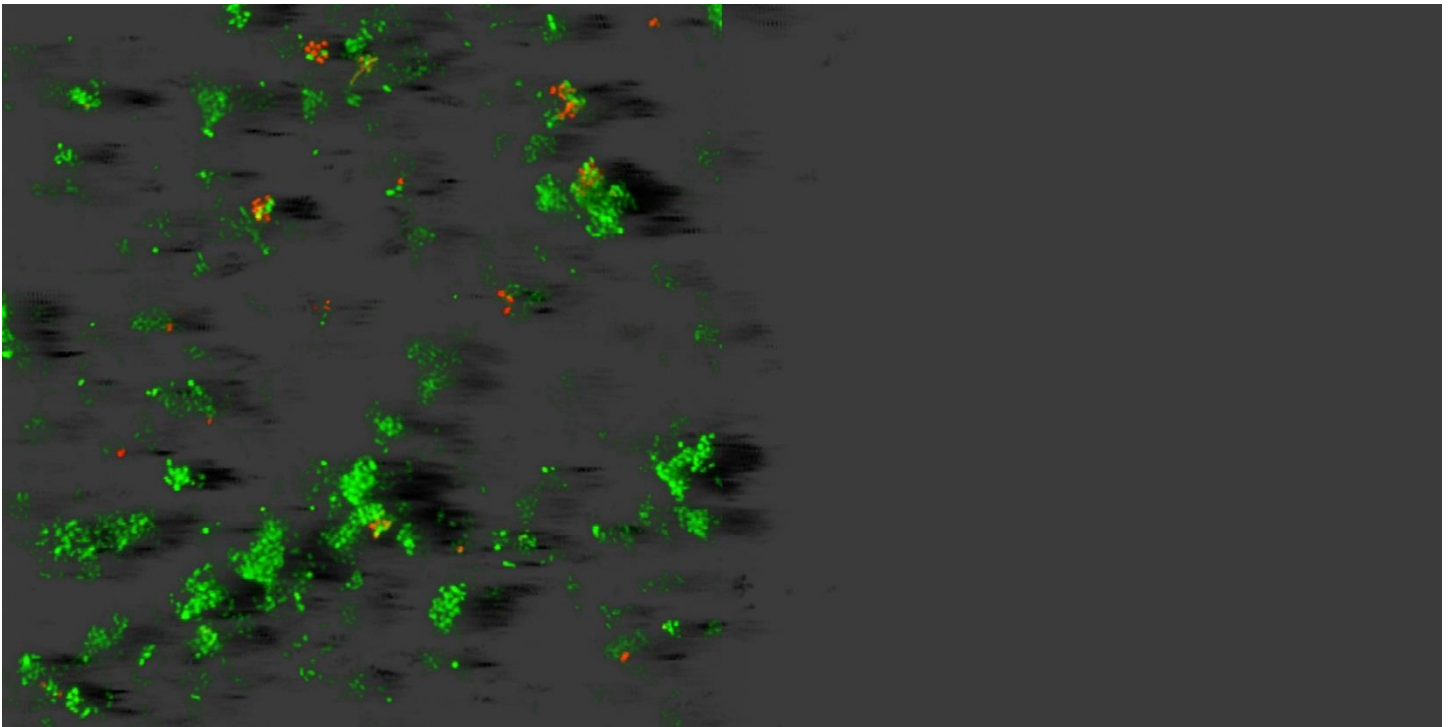

$Ab_{IC_{II}}\Delta blpI$

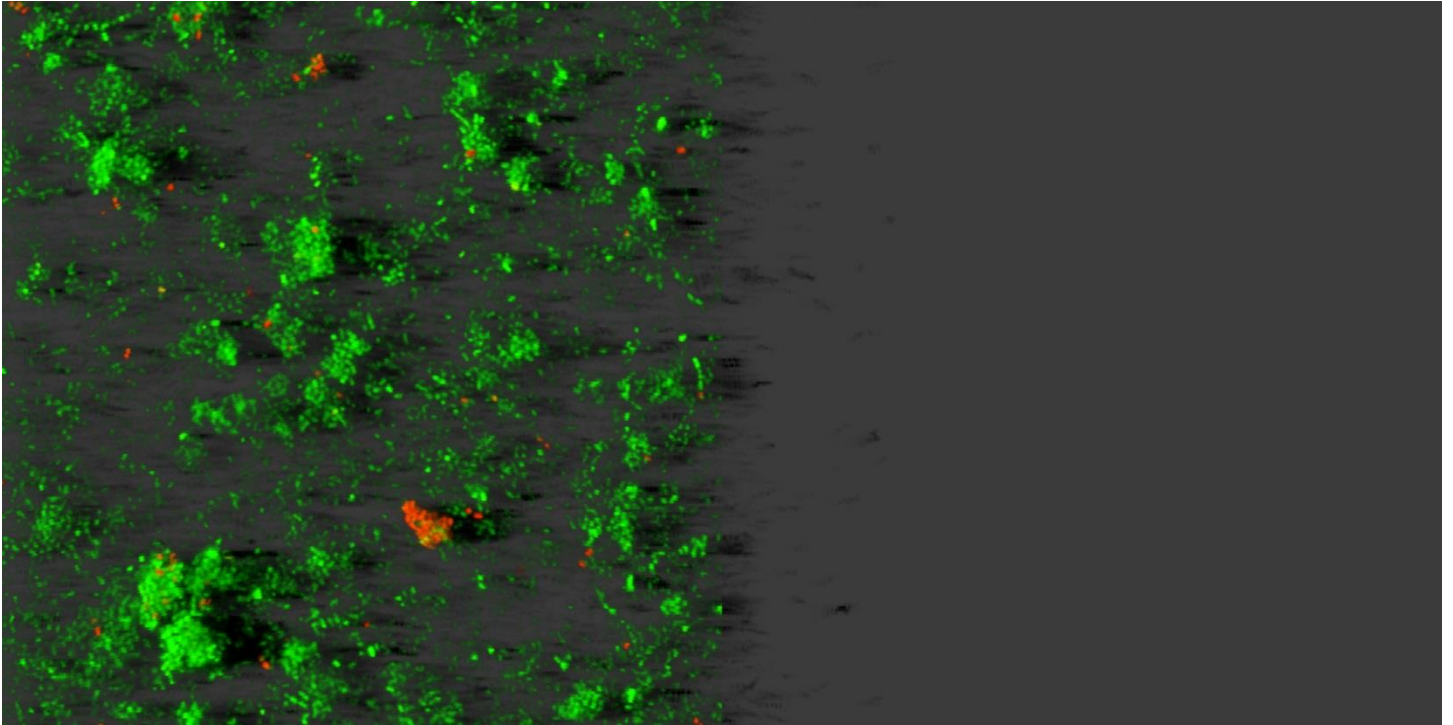

$Ab_{IC_{II}}\Delta blpI::pbpI_{IC_{II}}$

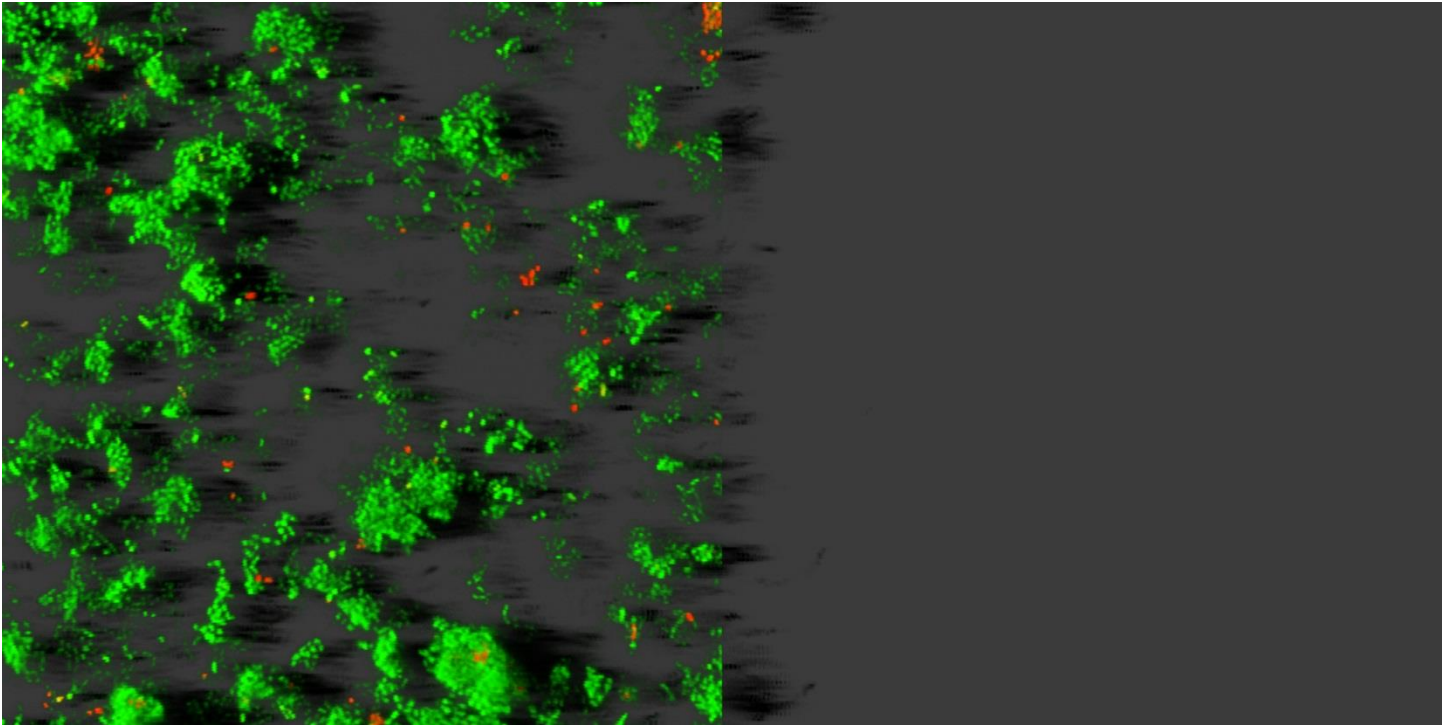

Ab<sub>IC</sub> II  $\Delta$ blp1::pblp1<sub>IC</sub>I

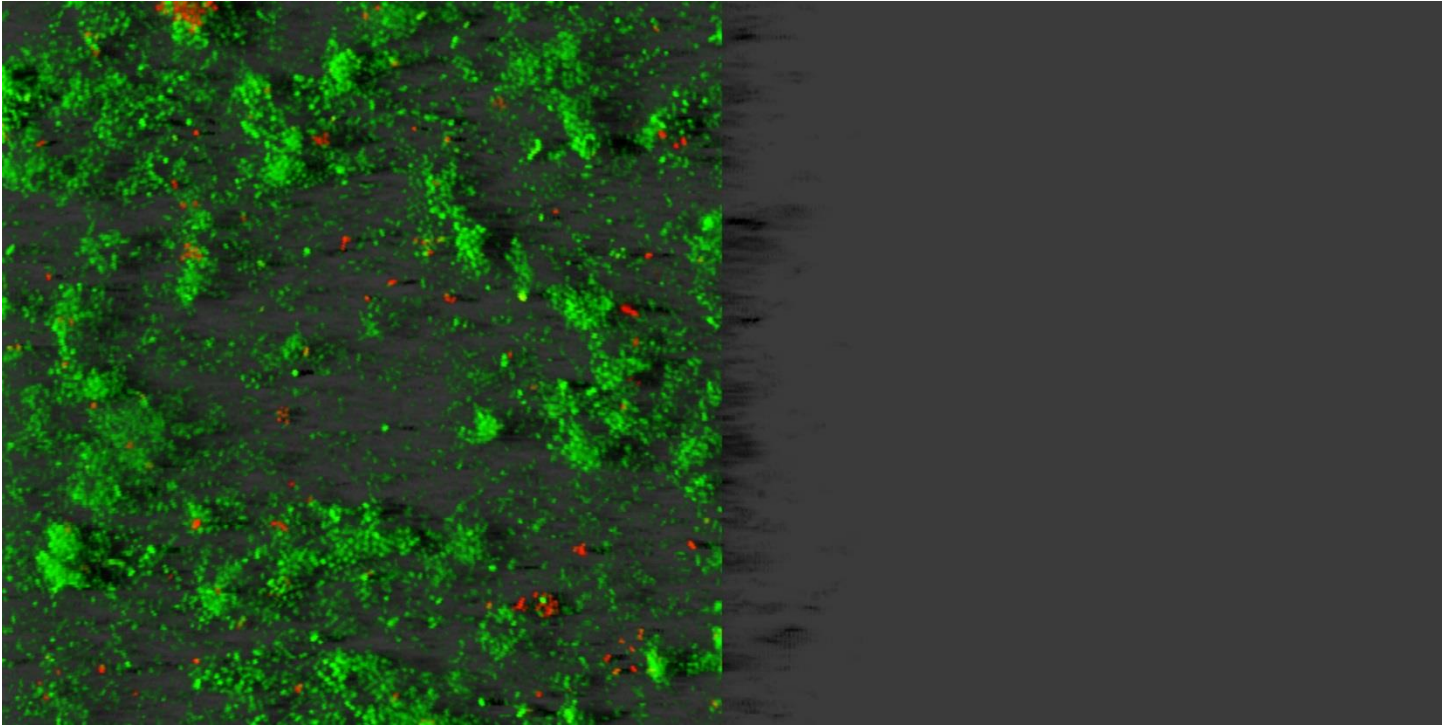

Ab<sub>IC</sub> II  $\Delta$ blp1::p

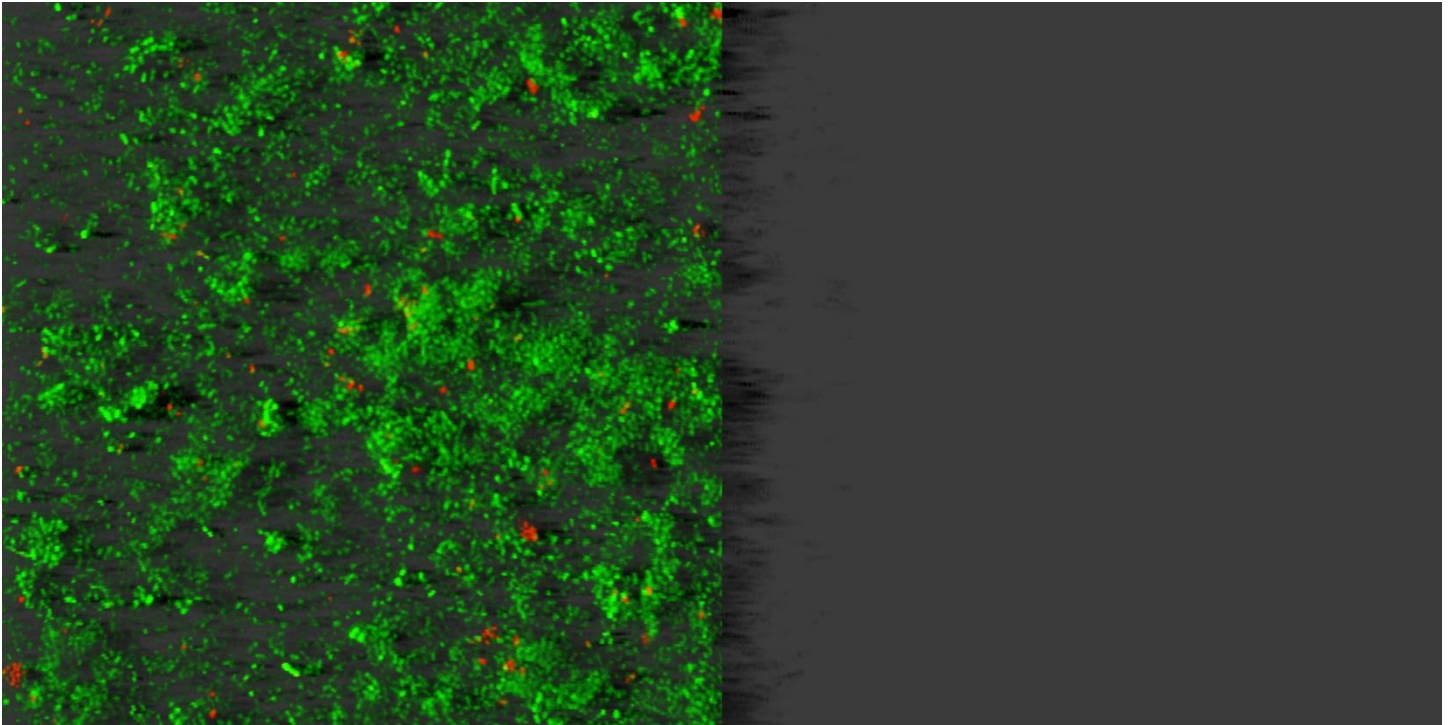

**After 24 hours of incubation:**

**Ab<sub>IC1</sub>**

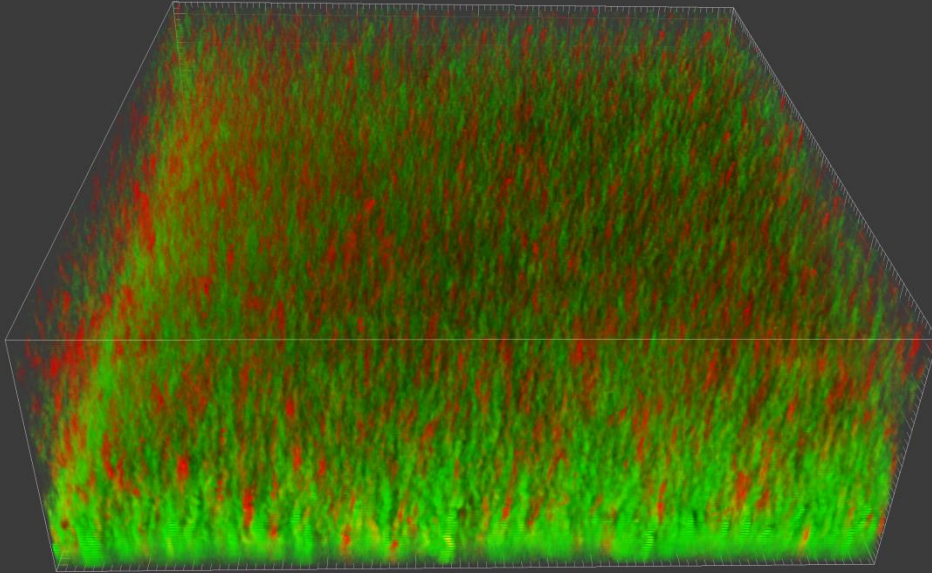

$Ab_{IC} \Delta blp1$

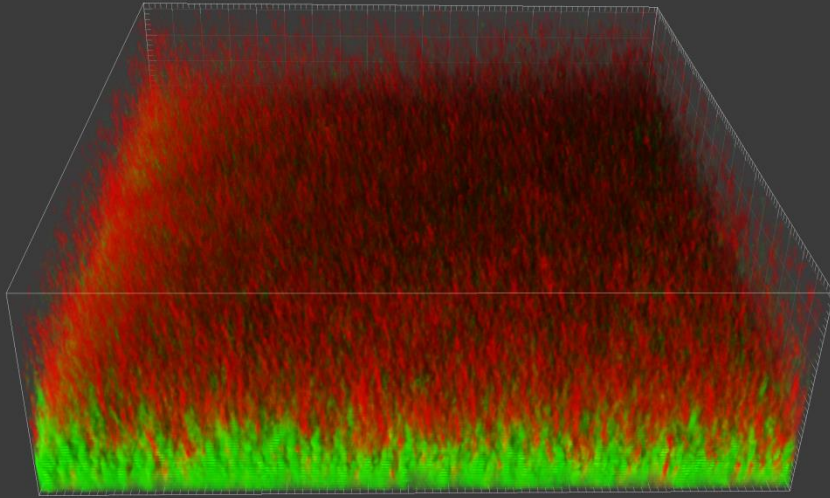

$Ab_{IC1}\Delta blp1::pblp1_{IC1}$

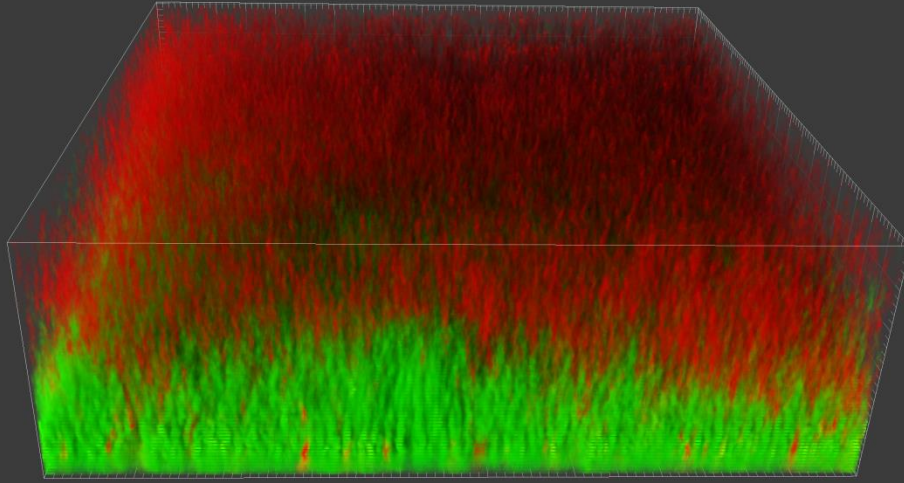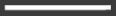



$Ab_{IC} \Delta blp1::pblp1_{IC II}$

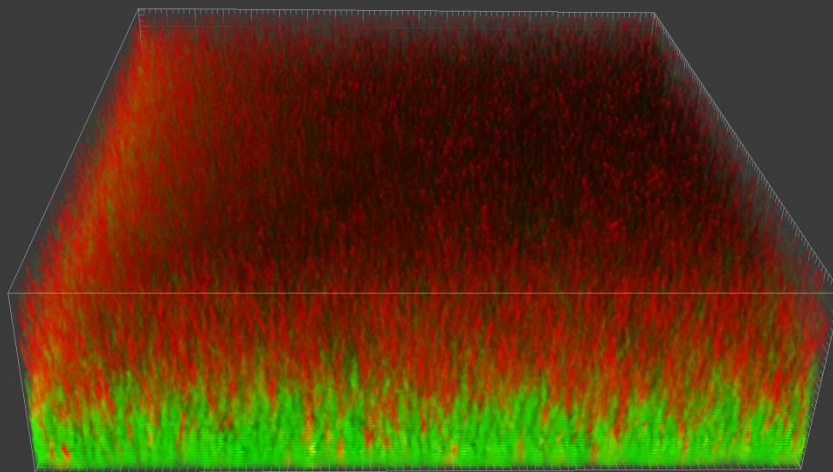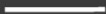

Ab<sub>1C</sub>Δ*blp1*::p

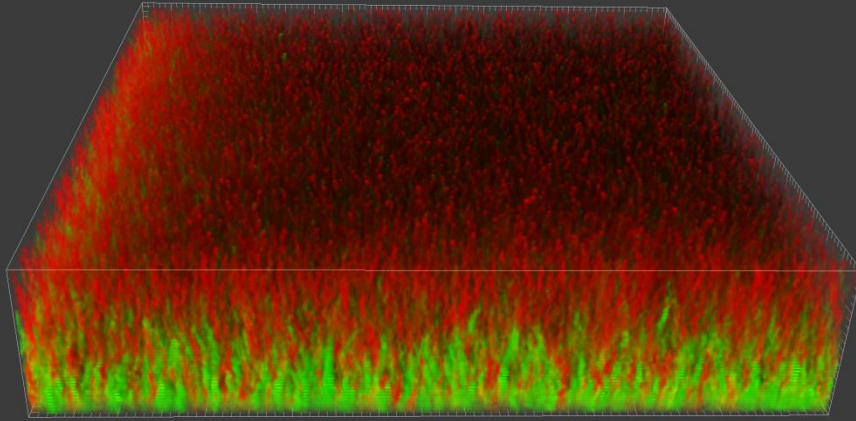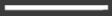

Ab<sub>IC II</sub>

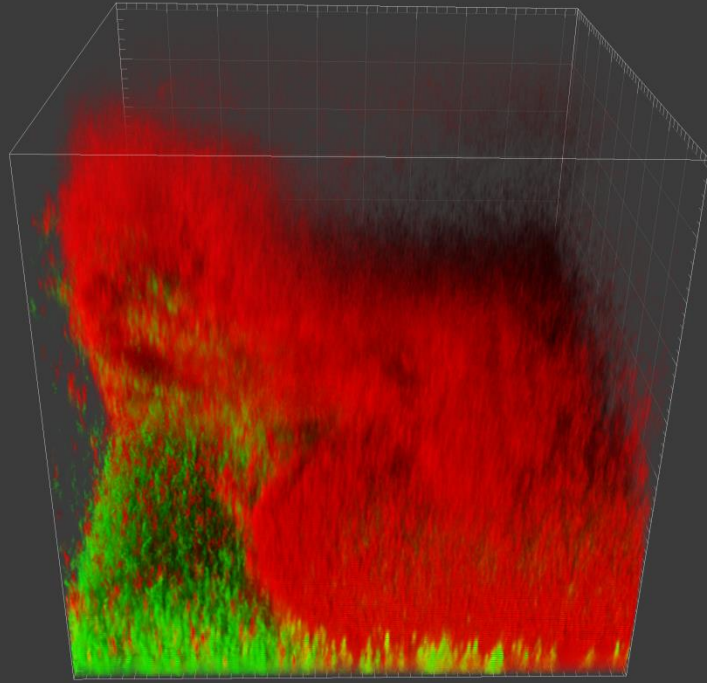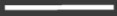

Ab<sub>IC</sub> II  $\Delta blp1$

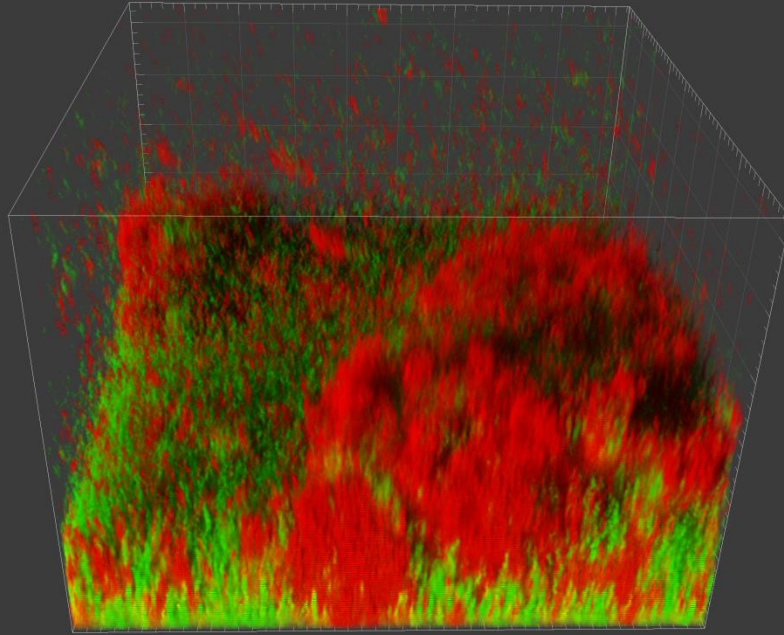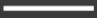

$Ab_{IC II} \Delta blpI :: pblpI_{IC II}$

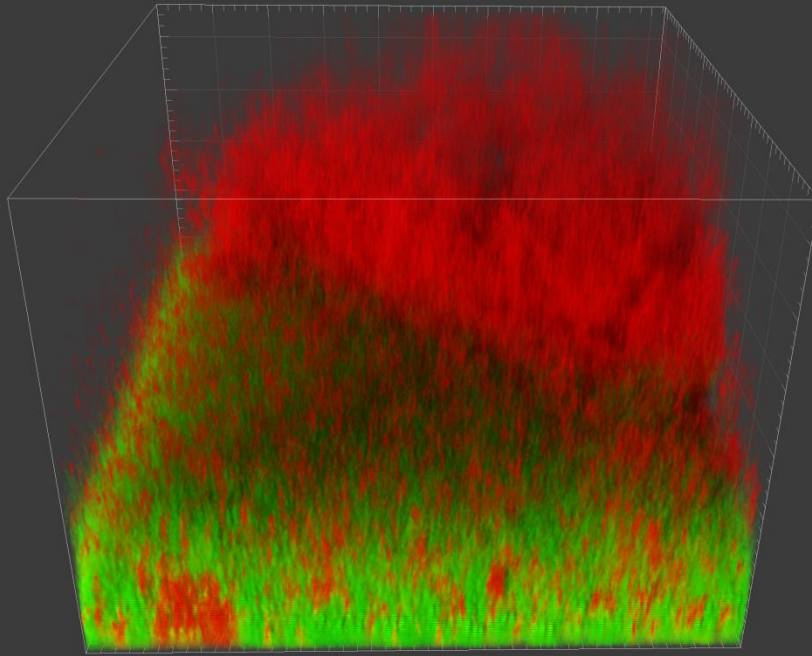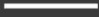

$Ab_{IC} \Delta blpI::pblpI_{IC}$

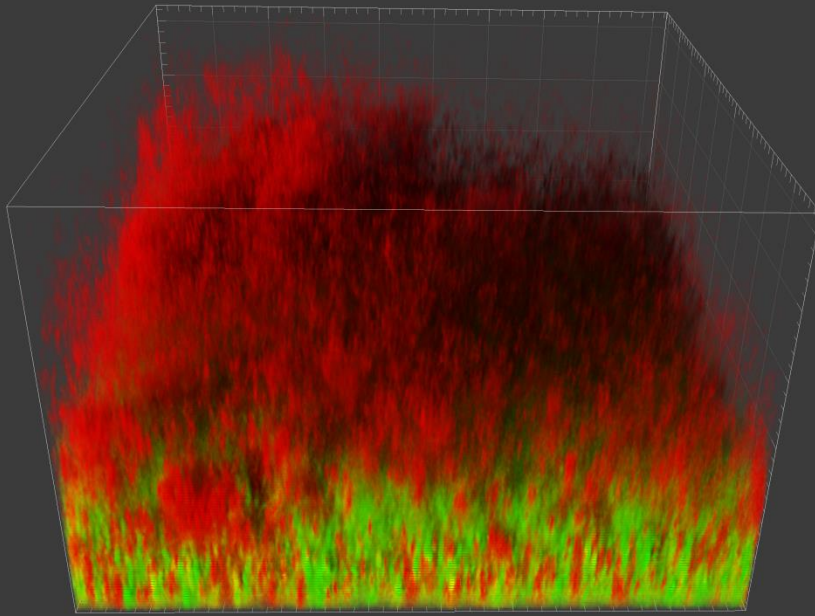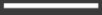

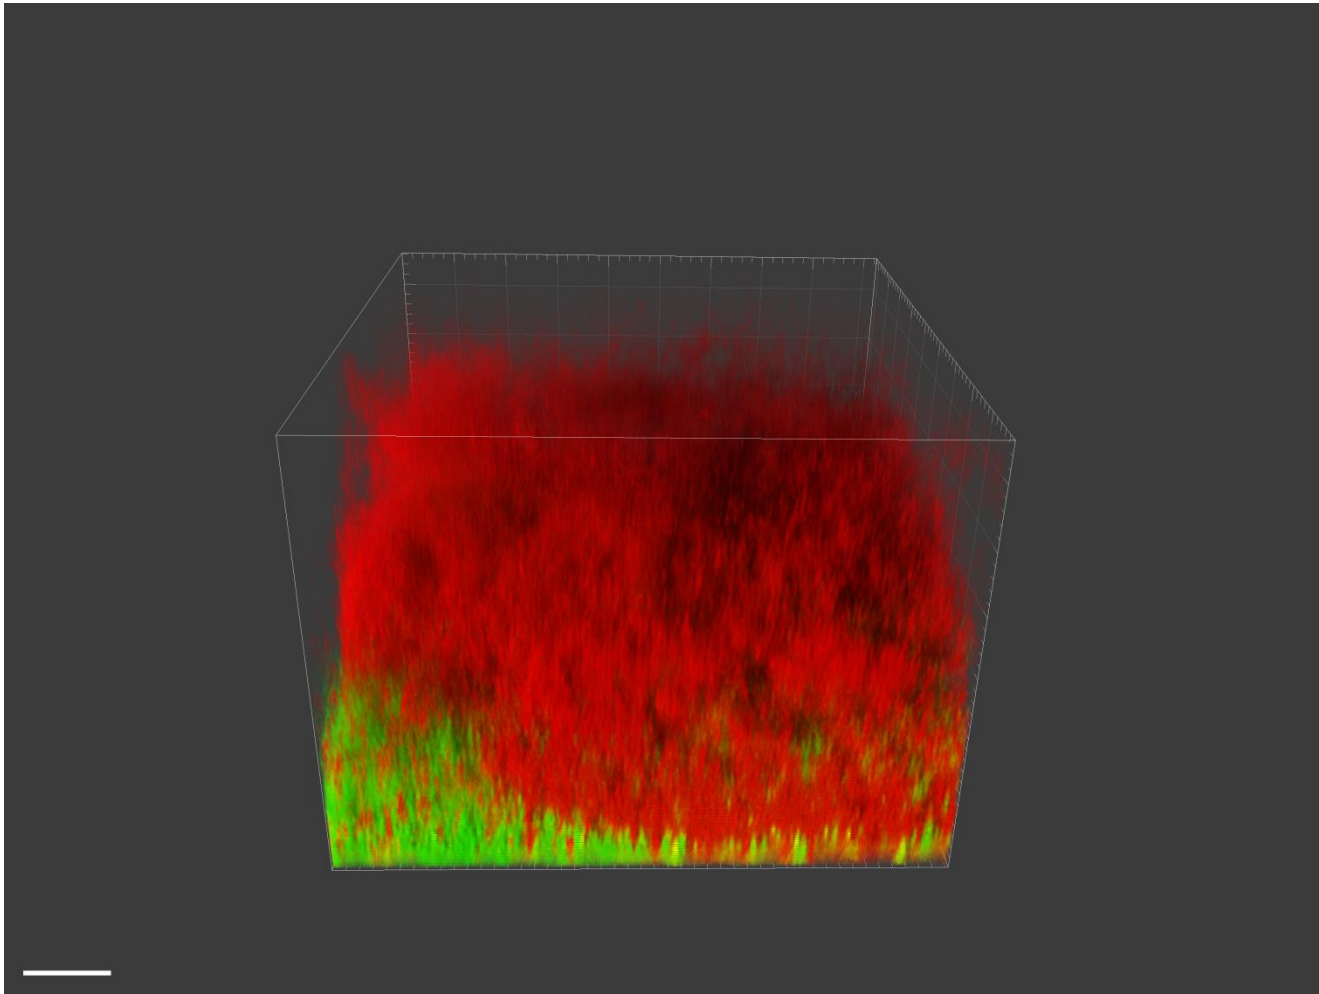

**Supplemental Fig. S2. CLSM analysis of biofilms formed by the *A. baumannii* strains after 2 and 24 hours of incubation. Biofilms were stained with SYTO9 and propodeum iodide.**
