# Supplementary material for: Blp1 protein shows virulence-associated features and elicits protective immunity to Acinetobacter baumannii infection
Source: PubMed Central journal article supplement (PMC6873735; doi:10.1186/s12866-019-1615-3), 2019-11-21
Supplement: 12866_2019_1615_MOESM4_ESM.pdf [file 12866_2019_1615_MOESM4_ESM.pdf]

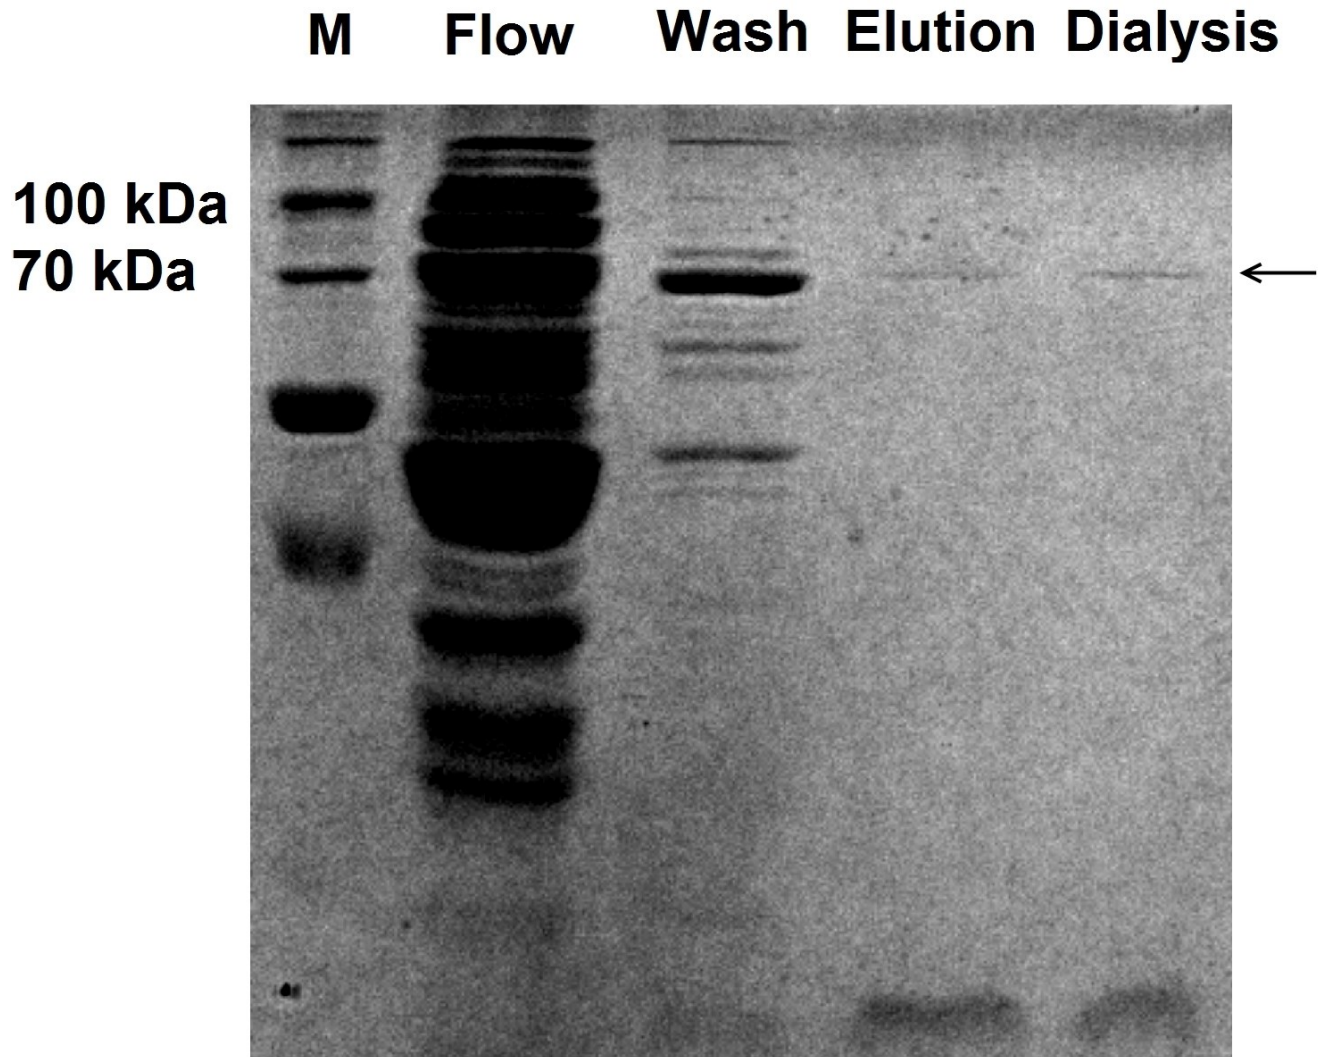

**Supplemental Fig. S3. Expression and purification of the recombinant His-Blp1<sub>2652-3362</sub> C-terminal fragment.** Fractions of flow-through, column washing, elution and dialysis in PBS buffer were fractionated in 12% SDS-PAGE. The position of His-Blp1<sub>2652-3362</sub> C-terminal fragment is indicated by the arrow. The positions of standard molecular mass markers (PageRuler™ Prestained Protein Ladder (Thermo Fisher Scientific)) are shown on the left.
